# Supplementary material for: Proteomic Profiling Reveals the Molecular Changes of Insomnia Patients
Source: Hindawi journal article supplement (doi:10.1155/2021/6685929), 2021-01-01
Supplement: f1 [file 6685929.f1.pdf]

**Table S1. Differentially expressed proteins.**

| Accession | Protein description                   | RatioD/F | P value | Gene name | D.D2 | D.D4 | D.D3 | D.D1 | F.F2 | F.F4 | F.F3 | F.F1  |
|-----------|---------------------------------------|----------|---------|-----------|------|------|------|------|------|------|------|-------|
| Q16706    | Alpha-mannosidase 2 OS                | 1.21     | 0.027   | MAN2A1    | 1.15 | 1.04 | 0.91 | 1.1  | 0.77 | 0.91 | 0.91 | 0.886 |
| P80723    | Brain acid soluble protein            | 0.758    | 0.007   | BASP1     | 0.87 | 0.96 | 1.06 | 0.83 | 1.3  | 1.23 | 1.08 | 1.297 |
| Q13449    | Limbic system-associated              | 0.826    | 0.042   | LSAMP     | 0.82 | 0.95 | 1.01 | 1.14 | 1.31 | 1.15 | 1.14 | 1.143 |
| P01023    | Alpha-2-macroglobulin C               | 0.712    | 0.004   | A2M       | 0.87 | 0.95 | 1    | 1.18 | 1.31 | 1.53 | 1.32 | 1.466 |
| P20815    | Cytochrome P450 3A5 O                 | 0.66     | 0.004   | CYP3A5    | 0.71 |      | 0.73 | 0.64 | 1.1  |      | 1.12 | 0.93  |
| P02748    | Complement component 9                | 0.828    | 0.01    | C9        | 0.89 | 1.04 | 0.87 | 1.05 | 1.21 | 1.16 | 1.14 | 1.137 |
| Q9NZP8    | Complement C1r subcomponent           | 0.811    | 0.004   | C1RL      | 0.86 | 0.93 | 0.99 | 1.02 | 1.14 | 1.13 | 1.27 | 1.137 |
| P02765    | Alpha-2-HS-glycoprotein               | 0.828    | 0.008   | AHSG      | 0.96 | 0.9  | 0.85 | 0.97 | 1.01 | 1.08 | 1.15 | 1.192 |
| Q9HAT2    | Sialate O-acetyltransferase C         | 0.821    | 0.018   | SIAE      | 0.84 | 0.86 | 0.79 |      | 1.01 | 0.93 | 1.09 |       |
| O14498    | Immunoglobulin superfamily            | 1.219    | 0.003   | ISLR      | 1.06 | 1.12 | 1.08 | 1.12 | 0.9  | 0.84 | 0.85 | 0.998 |
| Q9BS26    | Endoplasmic reticulum chaperone       | 1.432    | 0.003   | ERP44     | 1.18 | 1.11 | 1.25 | 1.07 | 0.73 | 0.77 | 0.75 | 0.976 |
| O00602    | Ficolin-1 OS=Homo sapiens             | 0.714    | 0.02    | FCN1      | 0.72 | 0.96 | 1.13 | 0.79 | 1.42 | 1.24 | 1.26 | 1.132 |
| P11021    | Endoplasmic reticulum chaperone       | 0.833    | 0.006   | HSPA5     | 0.95 | 0.98 | 0.91 | 1.04 | 1.25 | 1.15 | 1.18 | 1.072 |
| P54108    | Cysteine-rich secretory protein       | 0.786    | 0.005   | CRISP3    | 0.83 | 0.93 | 1.01 | 1    | 1.28 | 1.13 | 1.24 | 1.132 |
| Q9P121    | Neurotrimin OS=Homo sapiens           | 0.796    | 0.041   | NTM       |      |      | 0.95 | 0.97 |      |      | 1.26 | 1.145 |
| P00734    | Prothrombin OS=Homo sapiens           | 1.234    | 4E-04   | F2        | 1.03 | 1.06 | 1.06 | 1.08 | 0.92 | 0.83 | 0.87 | 0.805 |
| Q92484    | Acid sphingomyelinase-like            | 0.781    | 0.022   | SMPDL3A   | 0.91 | 0.87 |      | 0.85 | 1    | 1.12 |      | 1.245 |
| P14209    | CD99 antigen OS=Homo sapiens          | 0.798    | 0.003   | CD99      | 0.87 |      | 0.92 | 0.84 | 1.1  |      | 1.14 | 1.053 |
| P01871    | Immunoglobulin heavy chain            | 0.819    | 0.039   | IGHM      | 0.72 | 0.65 | 0.72 | 0.69 | 0.95 | 0.83 | 0.92 | 0.695 |
| P01709    | Immunoglobulin lambda chain           | 0.753    | 0.033   | IGLV2-8   |      | 0.73 | 0.66 | 0.78 |      | 0.98 | 1.07 | 0.833 |
| P00558    | Phosphoglycerate kinase               | 0.721    | 0.016   | PGK1      | 0.72 | 0.8  | 0.84 | 1.04 | 1.4  | 1.08 | 1.1  | 1.125 |
| Q9NZK5    | Adenosine deaminase 2 C               | 0.805    | 0.002   | ADA2      | 0.94 | 0.98 | 0.89 | 0.88 | 1.27 | 1.13 | 1.11 | 1.079 |
| Q96RT7    | Gamma-tubulin complex                 | 1.549    | 0.008   | TUBGCP6   |      | 1.17 |      | 1.1  |      | 0.75 |      | 0.718 |
| Q86VW0    | SEC14 domain and spectrin             | 0.53     | 2E-04   | SESTD1    | 0.57 | 0.8  | 0.66 | 0.64 | 1.29 | 1.25 | 1.33 | 1.159 |
| P08670    | Vimentin OS=Homo sapiens              | 0.362    | 0.02    | VIM       | 0.64 |      |      | 0.82 | 2.19 |      |      | 1.845 |
| P02776    | Platelet factor 4 OS=Homo sapiens     | 2.877    | 0.018   | PF4       | 2.13 |      | 1.01 | 1.15 | 0.58 |      | 0.38 | 0.53  |
| P14151    | L-selectin OS=Homo sapiens            | 0.764    | 0.007   | SELL      | 0.86 | 0.96 | 0.98 | 1.07 | 1.45 | 1.24 | 1.25 | 1.143 |
| Q15149    | Plectin OS=Homo sapiens               | 0.545    | 0.036   | PLEC      | 0.57 |      |      | 0.7  | 1.23 |      |      | 1.101 |
| O60832    | H/ACA ribonucleoprotein               | 1.252    | 0.037   | DKC1      |      | 0.89 |      | 0.95 |      | 0.76 |      | 0.715 |
| P07602    | Prosaposin OS=Homo sapiens            | 0.831    | 0.019   | PSAP      | 0.79 | 0.86 | 1.02 | 0.98 | 1.08 | 1.09 | 1.15 | 1.077 |
| O00461    | Golgi integral membrane protein       | 0.77     | 0.028   | GOLIM4    | 0.99 |      | 0.9  |      | 1.23 |      | 1.22 |       |
| P15941    | Mucin-1 OS=Homo sapiens               | 1.36     | 0.01    | MUC1      |      | 1.15 |      | 1.21 |      | 0.85 |      | 0.878 |
| Q86YW5    | Trem-like transcript 1 precursor      | 0.826    | 0.007   | TREML1    | 0.86 | 0.8  | 0.73 | 0.87 | 0.98 | 0.97 | 1.06 | 0.937 |
| P02679    | Fibrinogen gamma chain                | 4.174    | 0.013   | FGG       | 2.65 | 1.06 | 0.88 | 1.56 | 0.42 | 0.36 | 0.35 | 0.341 |
| P09486    | SPARC OS=Homo sapiens                 | 0.821    | 0.003   | SPARC     | 0.98 | 0.9  | 0.9  | 0.93 | 1.08 | 1.11 | 1.25 | 1.069 |
| P10619    | Lysosomal protective protein          | 0.64     | 0.032   | CTSA      |      | 0.83 |      | 0.93 |      | 1.3  |      | 1.458 |
| P02675    | Fibrinogen beta chain OS              | 4.694    | 0.002   | FGB       | 2.48 | 1.09 | 0.88 | 1.6  | 0.41 | 0.23 | 0.41 | 0.249 |
| P13489    | Ribonuclease inhibitor O              | 0.806    | 0.037   | RNH1      |      | 0.92 | 1.01 | 1.05 |      | 1.18 | 1.37 | 1.14  |
| A0A075B   | Immunoglobulin lambda chain           | 0.613    | 0.004   | IGLV3-9   | 0.65 | 0.53 | 0.77 | 0.61 | 1.07 | 1.07 | 1.2  | 0.833 |
| P14618    | Pyruvate kinase PKM OS                | 0.829    | 0.002   | PKM       | 0.96 | 0.96 | 0.9  | 1    | 1.16 | 1.07 | 1.23 | 1.149 |
| P02647    | Apolipoprotein A-I OS=Homo sapiens    | 0.797    | 0.024   | APOA1     | 0.84 | 0.99 | 1.15 | 0.97 | 1.35 | 1.23 | 1.27 | 1.111 |
| P29122    | Proprotein convertase subtilisin      | 0.829    | 0.02    | PCSK6     | 0.87 | 0.89 | 0.94 |      | 1.06 | 1.17 | 1.01 |       |
| Q8IUL8    | Cartilage intermediate layer          | 0.652    | 4E-04   | CILP2     | 1.03 | 0.93 | 0.96 | 0.85 | 1.57 | 1.33 | 1.54 | 1.345 |
| Q9H299    | SH3 domain-binding glutathione        | 0.658    | 0.049   | SH3BGRL3  | 0.68 | 0.58 | 0.69 | 0.86 | 1.25 | 0.97 | 1.33 | 0.714 |
| P04085    | Platelet-derived growth factor        | 0.571    | 0.002   | PDGFA     | 0.68 | 0.88 | 0.78 | 0.93 | 1.53 | 1.37 | 1.67 | 1.156 |
| P18428    | Lipopolysaccharide-binding            | 1.703    | 0.038   | LBP       |      | 1.18 | 1.36 | 0.95 |      | 0.76 | 0.5  | 0.786 |
| O76074    | cGMP-specific 3',5'-cyclic            | 1.528    | 0.035   | PDE5A     | 1.1  |      | 1.19 |      | 0.7  |      | 0.8  |       |
| Q8N3X6    | Ligand-dependent nuclear              | 0.772    | 0.017   | LCORL     |      | 0.96 | 0.84 | 1.03 |      | 1.18 | 1.3  | 1.184 |
| P22304    | Iduronate 2-sulfatase OS=Homo sapiens | 0.823    | 0.047   | IDS       | 0.84 | 0.9  | 1.05 |      | 1.18 | 1.11 | 1.1  |       |
| P0DOY3    | Immunoglobulin lambda chain           | 0.774    | 0.013   | IGLC3     | 0.75 | 0.76 | 0.91 | 0.85 | 1.13 | 1.06 | 1.15 | 0.895 |
| P04114    | Apolipoprotein B-100 OS=Homo sapiens  | 1.744    | 0.01    | APOB      | 1.35 | 1.11 | 0.83 | 0.95 | 0.47 | 0.8  | 0.59 | 0.566 |

|        |                                     |       |       |          |      |      |      |      |      |      |      |       |
|--------|-------------------------------------|-------|-------|----------|------|------|------|------|------|------|------|-------|
| Q9ULV0 | Unconventional myosin- <sup>v</sup> | 0.727 | 0.043 | MYO5B    |      | 0.8  | 0.77 |      |      | 1.01 | 1.15 |       |
| P02775 | Platelet basic protein OS:          | 0.735 | 0.007 | PPBP     | 0.81 | 0.9  | 0.84 | 1.03 | 1.18 | 1.17 | 1.43 | 1.088 |
| P02671 | Fibrinogen alpha chain O            | 2.197 | 0.003 | FGA      | 1.51 | 1.01 | 0.87 | 1.4  | 0.7  | 0.53 | 0.48 | 0.474 |
| P09972 | Fructose-bisphosphate al            | 0.776 | 0.031 | ALDOC    | 0.95 |      | 0.87 |      | 1.19 |      | 1.16 |       |
| P08709 | Coagulation factor VII O            | 0.757 | 0.018 | F7       | 0.75 | 0.87 |      | 0.92 | 1.04 | 1.14 |      | 1.179 |
| P0C0L4 | Complement C4-A OS=F                | 1.342 | 0.004 | C4A      | 1.24 | 1.11 | 1.42 | 1.12 | 0.96 | 0.93 | 0.84 | 0.918 |
| P0C0L5 | Complement C4-B OS=F                | 1.298 | 0.001 | C4B      | 1.21 | 1.06 | 1    | 1.14 | 0.86 | 0.86 | 0.88 | 0.799 |
| Q13201 | Multimerin-1 OS=Homo                | 0.796 | 0.001 | MMRN1    | 0.87 | 0.92 | 0.92 | 1.01 | 1.22 | 1.19 | 1.17 | 1.093 |
| P05154 | Plasma serine protease in           | 0.81  | 0.049 | SERPINA5 | 0.88 | 0.89 | 0.8  | 1.09 | 1.14 | 1.15 | 1.08 | 1.15  |
| P05067 | Amyloid-beta precursor p            | 0.707 | 2E-05 | APP      | 0.85 | 0.88 | 0.87 | 0.92 | 1.21 | 1.19 | 1.27 | 1.303 |
| P00738 | Haptoglobin OS=Homo s               | 1.605 | 0.041 | HP       | 1.42 | 1.29 | 1.7  | 0.84 | 0.87 | 0.83 | 0.95 | 0.628 |
| P00742 | Coagulation factor X OS:            | 0.812 | 0.024 | F10      | 0.93 | 0.91 | 0.92 | 0.95 | 1.02 | 1.09 | 1.22 | 1.252 |
| P24298 | Alanine aminotransferase            | 0.808 | 0.018 | GPT      | 0.92 | 0.92 |      |      | 1.17 | 1.11 |      |       |
| Q14956 | Transmembrane glycoprc              | 1.316 | 0.027 | GPNMB    | 1.32 | 1.18 | 1.02 | 1.32 | 0.81 | 0.93 | 0.83 | 1.114 |
| P62805 | Histone H4 OS=Homo sa               | 0.642 | 0.018 | HIST1H4A | 0.93 | 0.68 | 0.73 | 0.74 | 1.49 | 1.18 | 0.86 | 1.254 |
| Q9Y5C1 | Angiopoietin-related prot           | 0.817 | 0.019 | ANGPTL3  | 0.74 | 0.88 | 0.9  | 0.92 | 1.15 | 1.04 | 1.08 | 0.944 |
| P07738 | Bisphosphoglycerate mut             | 0.677 | 0.042 | BPGM     | 0.6  | 0.93 | 0.75 | 1.13 | 1.22 | 1.17 | 1.57 | 1.067 |
